# Supplementary material for: Impact of Statewide Prevention and Reduction of Clostridioides difficile (SPARC), a Maryland public health–academic collaborative: an evaluation of a quality improvement intervention
Source: PubMed Central journal article supplement — BMJ Qual Saf. 2021 Dec 9;31(2):153–62. doi: 10.1136/bmjqs-2021-014014 (PMC8784990; doi:10.1136/bmjqs-2021-014014), 2021-12-09
Supplement: bmjqs-2021-014014supp001.pdf [file bmjqs-2021-014014supp001.pdf]

**Appendix**

Appendix Table 1: Interview Participants, by Stakeholder Type

| <b>Respondent Role</b>                                                                                                                                                                    | <b>Round 1<br/>(4-6 months)*</b> | <b>Round 2<br/>(12 months)±</b> | <b>Total</b> |
|-------------------------------------------------------------------------------------------------------------------------------------------------------------------------------------------|----------------------------------|---------------------------------|--------------|
| Total Identified                                                                                                                                                                          | 50                               | 40                              | 90           |
| Total Participating                                                                                                                                                                       |                                  |                                 |              |
| Implementation Intervention Plan Domain leads (i.e. Infection Control Directors/Coordinators, Pharmacists, Nurses, Physicians, Microbiology, Environmental Cleaning, Quality Improvement) | 28                               | 10                              | 38           |
| Hospital Executives (e.g., Chief nursing or medical officers)                                                                                                                             | 4                                | 0                               | 4            |
| Frontline health care providers (nurses, physicians, pharmacy staff, program coordinator)                                                                                                 | 5*                               | 5                               | 10           |
| <b>Total</b>                                                                                                                                                                              | <b>37</b>                        | <b>15</b>                       | <b>52</b>    |
| <b>Response Rate</b>                                                                                                                                                                      | <b>74%</b>                       | <b>38%</b>                      | <b>58%</b>   |

\*Note: Two front line healthcare provider staff respondents completed telephone interviews instead of surveys.

±Note: Follow-up interview and survey participants in some cases were the same and in some cases were different than those who participated in Round 1 interviews and surveys.

Table created by the authors

Appendix Table 2: Regression Model Demonstrating the Impact of Statewide Prevention and Reduction of *C. difficile* (SPARC) Collaborative

|                                                                  | Incidence rate ratios (IRR) | 95% Confidence Interval | P value |
|------------------------------------------------------------------|-----------------------------|-------------------------|---------|
| <b>Evaluation group</b>                                          |                             |                         |         |
| Control                                                          | 1                           |                         |         |
| SPARC intervention                                               | 1.64                        | (1.14 – 2.37)           | 0.008   |
| <b>Intervention phase</b>                                        |                             |                         |         |
| Pre-SPARC Quarter 1                                              | 1                           |                         |         |
| Pre-SPARC Quarter 2                                              | 1.06                        | (0.85 – 1.31)           | 0.619   |
| Pre-SPARC Quarter 3                                              | 0.89                        | (0.71 – 1.11)           | 0.310   |
| Pre-SPARC Quarter 4                                              | 0.73                        | (0.58 – 0.91)           | 0.007   |
| Post-SPARC Quarter 1                                             | 0.79                        | (0.63 – 0.99)           | 0.039   |
| Post-SPARC Quarter 2                                             | 0.71                        | (0.57 – 0.90)           | 0.004   |
| Post-SPARC Quarter 3                                             | 0.80                        | (0.64 – 1.00)           | 0.054   |
| Post-SPARC Quarter 4                                             | 0.77                        | (0.61 – 0.96)           | 0.024   |
| Post-SPARC Quarter 5                                             | 0.73                        | (0.58 – 0.92)           | 0.009   |
| Post-SPARC Quarter 6                                             | 0.73                        | (0.57 – 0.93)           | 0.011   |
| <b>Interactions of evaluation groups and intervention phases</b> |                             |                         |         |
| Pre-SPARC Quarter 1                                              | 1                           |                         |         |
| Pre-SPARC Quarter 2                                              | 0.90                        | (0.64 – 1.27)           | 0.560   |
| Pre-SPARC Quarter 3                                              | 0.96                        | (0.67 – 1.37)           | 0.814   |
| Pre-SPARC Quarter 4                                              | 1.02                        | (0.71 – 1.46)           | 0.930   |
| Post-SPARC Quarter 1                                             | 0.73                        | (0.50 – 1.06)           | 0.098   |
| Post-SPARC Quarter 2                                             | 0.56                        | (0.38 – 0.84)           | 0.005   |
| Post-SPARC Quarter 3                                             | 0.46                        | (0.31 – 0.69)           | <0.001  |
| Post-SPARC Quarter 4                                             | 0.51                        | (0.34 – 0.77)           | 0.001   |
| Post-SPARC Quarter 5                                             | 0.50                        | (0.33 – 0.75)           | 0.001   |
| Post-SPARC Quarter 6                                             | 0.55                        | (0.35 – 0.88)           | 0.012   |
| Predicted <i>C. difficile</i> count                              | 1.02                        | (1.01 – 1.03)           | <0.001  |

\*Difference-in-difference analytic approach using random intercept negative binomial mixed model that regresses *C. difficile* count on a dichotomous variable indicating evaluation group (SPARC vs. control); dummy variables for the time periods (i.e., 4 pre-SPARC quarters and 6 post-SPARC quarters); and interactions of the evaluation group and the time period dummy variables, and National Healthcare Safety Network-predicted *C. difficile* count with an offset of patient days. The interactions terms represented the impact of the SPARC program.

Table created by the authors

Appendix Table 3: Interaction of Participating Hospitals with the SPARC Collaborative

| Hospital | Implementation Planning |            |                 |                                 |                                           | Technical Assistance Interactions |                                      |                    |                             |                    |
|----------|-------------------------|------------|-----------------|---------------------------------|-------------------------------------------|-----------------------------------|--------------------------------------|--------------------|-----------------------------|--------------------|
|          | Gap Assessment          | Site Visit | Feedback Report | Site Visit Feedback Report Call | Intervention Implementation Plan Complete | 1st Check-in                      | Provided Updated Plan (Date of Last) | Attended Webinars* | Attended In-Person Meeting* | Attended Training* |
| A        | X                       | 6/27/2018  | 8/21/2018       |                                 |                                           |                                   |                                      | X                  |                             | X                  |
| B        | X                       | 9/19/2018  | X               | X                               | X                                         | X                                 | 10/07/19                             | X                  |                             |                    |
| C        | X                       | 10/25/2018 | X               | X                               | X                                         | X                                 | 7/24/19                              | X                  | X                           | X                  |
| D        | X                       | 11/5/2018  | X               | X                               | X                                         | X                                 | 10/29/19                             | X                  |                             |                    |
| E        | X                       | 11/16/2018 | X               | X                               | X                                         | X                                 | 10/29/19                             | X                  |                             | X                  |
| F        | X                       | 12/3/2018  | X               | X                               | X                                         | X                                 | 2/12/20                              | X                  |                             | X                  |
| G        | X                       | 1/11/2019  | X               | X                               | X                                         | X                                 | 6/10/20                              | X                  | X                           | X                  |
| H        | X                       | 1/23/2019  | X               | X                               | X                                         | X                                 | 11/21/19                             | X                  | X                           | X                  |
| I        | X                       | 3/14/2019  | X               | X                               | X                                         | X                                 | 11/14/19                             | X                  |                             | X                  |
| J        | X                       | 3/25/2019  | X               | 10/24/2019                      |                                           |                                   |                                      |                    |                             | X                  |
| K        | X                       | 4/18/2019  | X               | X                               | X                                         | X                                 | 12/30/19                             |                    | X                           |                    |
| L        | X                       | 8/21/2019  | X               | 10/9/2019                       |                                           |                                   |                                      | X                  | X                           |                    |

\*Attendance by participating hospitals at the various Technical Assistance events is likely underrepresented, as some events only collected participant name and not affiliated hospitals and, in some cases, participants did not report their hospital even when it was requested.

Table created by the authors
